# Supplementary material
Source: PubMed Central journal article supplement (PMC6515606)
Supplement: jamaneurol-76-588-s001.pdf [file jamaneurol-76-588-s001.pdf]

## Supplementary Online Content

Etminan N, Chang H-S, Hackenberg K, et al. Worldwide incidence of aneurysmal subarachnoid hemorrhage according to region, time period, blood pressure, and smoking prevalence in the population: a systematic review and meta-analysis. *JAMA Neurol*. Published online January 19, 2019. doi:10.1001/jamaneurol.2019.0006

**eTable 1.** Summary of all 75 included studies and 84 study periods, according to ascending midyear of study

**eTable 2.** Characteristics of the overall and age-specific and sex-specific datasets

**eTable 3.** Crude SAH incidence with 95% CIs and risk ratios for SAH in the age-specific and sex-specific dataset

**eTable 4.** Overall and age-specific risk ratios in women vs men in the age-specific and sex-specific dataset (34 study periods)

**eTable 5.** Time trends in SAH incidence in the in the age-specific and sex-specific dataset (34 study periods)

**eTable 6.** Estimated blood pressures in 1980 and 2010 for women and men aged 45-54 years and 55-74 years including annual change from 1977 to 2014

**eFigure 1.** Selection of studies

**eFigure 2.** Regional time trends for studies reporting on consecutive SAH incidence for the same study population

**eFigure 3.** Crude incidence of SAH in age-specific and sex-specific dataset overall, in Europe, and in Japan only

**eReferences.**

This supplementary material has been provided by the authors to give readers additional information about their work.

**eTable 1.** Summary of all 75 included studies and 84 study periods, according to ascending midyear of study

| Study Population             | Region      | Midyear of Study | Person-years | No SAH Patients | Incidence Per 100.000 py (95% CI) | Additional Case Finding Methods <sup>a</sup> | CT Rate of Patients (%) | Additional Diagnostic Criteria <sup>b</sup> |
|------------------------------|-------------|------------------|--------------|-----------------|-----------------------------------|----------------------------------------------|-------------------------|---------------------------------------------|
| Rochester <sup>1</sup>       | USA         | 1955             | 331 081      | 29              | 8.8 (6.1 to 12.6)                 | adhjm                                        | 0                       | AB                                          |
| Rochester <sup>1</sup>       | USA         | 1965             | 451 611      | 52              | 11.5 (8.8 to 15.1)                | adhjm                                        | 0                       | AB                                          |
| Frederiksberg <sup>2</sup>   | Denmark     | 1972             | 197 542      | 13              | 6.6 (3.8 to 11.3)                 | abe                                          | 0                       | ABCF                                        |
| Espoo <sup>3</sup>           | Finland     | 1972             | 226 200      | 42              | 18.6 (13.7 to 25.1)               | ae                                           | 0                       | BF                                          |
| Rochester <sup>c1</sup>      | USA         | 1975             | 543 561      | 61              | 11.2 (8.7 to 14.4)                | adhjm                                        | 58 <sup>d</sup>         | ABD                                         |
| Shibata <sup>e4</sup>        | Japan       | 1977             | 225 564      | 31              | 13.7 (9.7 to 19.5)                | abjm                                         | 0                       | ABCF                                        |
| Söderhamn <sup>5</sup>       | Sweden      | 1977             | 96 690       | 13              | 13.5 (7.8 to 23.2)                | abdem                                        | 1                       | ABF                                         |
| Tilburg <sup>e6</sup>        | Netherlands | 1979             | 302 712      | 24              | 7.9 (5.3 to 11.8)                 | abdeij                                       | 58                      | ABCF                                        |
| Kuopio <sup>7</sup>          | Finland     | 1979             | 159 033      | 24              | 15.1 (10.1 to 22.5)               | abeim                                        | 8                       | ABC                                         |
| Espoo <sup>3</sup>           | Finland     | 1979             | 273 700      | 33              | 12.1 (8.6 to 17.0)                | ae                                           | 11                      | BF                                          |
| Auckland <sup>e8</sup>       | New Zealand | 1982             | 1 658 908    | 148             | 8.9 (7.6 to 10.5)                 | abeim                                        | 61 <sup>f</sup>         | ABCEF                                       |
| Lund-Orup <sup>9</sup>       | Sweden      | 1984             | 474 777      | 28              | 5.9 (4.1 to 8.5)                  | im                                           | 89 <sup>f</sup>         | AB                                          |
| Israel north <sup>10</sup>   | Israel      | 1984             | 600 000      | 85              | 14.2 (11.5 to 17.5)               | adej                                         | 21                      | ABC                                         |
| Oxford <sup>11</sup>         | UK          | 1984             | 420 000      | 33              | 7.9 (5.6 to 11.1)                 | abejm                                        | 64 <sup>f</sup>         | ABF                                         |
| North-Karelia <sup>c12</sup> | Finland     | 1984             | 1 890 000    | 407             | 21.5 (19.5 to 23.7)               | aim                                          | 41 <sup>f</sup>         | ABCF                                        |

|                                   |             |      |           |       |                     |             |                   |                |
|-----------------------------------|-------------|------|-----------|-------|---------------------|-------------|-------------------|----------------|
| Copenhagen <sup>13</sup>          | Denmark     | 1984 | 315 168   | 49    | 15.6 (11.8 to 20.6) | ak          | <sup>g</sup>      | ABDEF          |
| Söderhamn <sup>5</sup>            | Sweden      | 1985 | 92 208    | 10    | 10.9 (5.8 to 20.2)  | abdem       | 37                | ABF            |
| Rochester <sup>e1</sup>           | USA         | 1985 | 617 554   | 43    | 7.0 (5.2 to 9.4)    | adhjm       | 85 <sup>d</sup>   | ABD            |
| Izumo City A <sup>c,e14</sup>     | Japan       | 1985 | 807 490   | 170   | 21.1 (18.1 to 24.5) | ai          | 98.8 <sup>f</sup> | ABCE           |
| Umbria <sup>15</sup>              | Italy       | 1988 | 147 654   | 15    | 10.2 (6.1 to 16.9)  | abej        | 60                | A              |
| King County <sup>e16</sup>        | USA         | 1988 | 2 800 000 | 171   | 6.1 (5.3 to 7.1)    | befjm       | 97 <sup>f</sup>   | ACE            |
| Valley d'Aosta A <sup>17,18</sup> | Italy       | 1989 | 114 325   | 6     | 5.3 (2.4 to 11.7)   | abdefhijkm  | 82                | ABCDF          |
| Frederiksberg <sup>19</sup>       | Denmark     | 1990 | 85 611    | 2     | 2.3 (0.6 to 9.3)    | abde        | 74                | AF             |
| Perth <sup>e20</sup>              | Australia   | 1990 | 208 062   | 18    | 8.7 (5.5 to 13.7)   | abcdefijklm | 74 <sup>d</sup>   | ABDF           |
| Espoo <sup>3</sup>                | Finland     | 1990 | 269 608   | 39    | 14.5 (10.6 to 19.8) | aeh         | 60                | BF             |
| Asturias <sup>21</sup>            | Spain       | 1991 | 417 033   | 28    | 6.7 (4.6 to 9.7)    | bj          | 85.7 <sup>f</sup> | F <sup>g</sup> |
| Belluno <sup>e22</sup>            | Italy       | 1992 | 211 389   | 12    | 5.7 (3.2 to 10)     | abefjk      | 90                | ABF            |
| Novosibirsk <sup>23</sup>         | Russia      | 1992 | 158 234   | 14    | 8.9 (5.2 to 14.9)   | abehijm     | 0 <sup>h</sup>    | ABC            |
| Ahmadi <sup>24</sup>              | Kuwait      | 1992 | 873 597   | 4     | 0.5 (0.2 to 1.2)    | ab          | 100               | AF             |
| Auckland <sup>e25</sup>           | New Zealand | 1992 | 1 890 738 | 163   | 8.6 (7.4 to 10.1)   | aei         | 95 <sup>f</sup>   | ABCE           |
| Sweden north <sup>e26</sup>       | Sweden      | 1993 | 8 212 800 | 1,547 | 18.8 (17.9 to 19.8) | abhk        | 86.7 <sup>f</sup> | ABCF           |
| Shimokita <sup>e27</sup>          | Japan       | 1993 | 899 910   | 201   | 22.3 (19.5 to 25.7) | ai          | 100 <sup>f</sup>  | AC             |
| Dijon <sup>e28</sup>              | France      | 1995 | 3 303 036 | 86    | 2.6 (2.1 to 3.2)    | abfhjk      | 95.3 <sup>f</sup> | ACDF           |

|                                |           |      |           |       |                     |               |                    |                |
|--------------------------------|-----------|------|-----------|-------|---------------------|---------------|--------------------|----------------|
| Perth B <sup>29</sup>          | Australia | 1995 | 136 095   | 5     | 3.7 (1.5 to 8.8)    | abdfhjk       | 78.4 <sup>d</sup>  | BCDF           |
| North Manhattan <sup>c30</sup> | USA       | 1995 | 571 700   | 53    | 9.3 (7.1 to 12.1)   | bdefghijklm   | 100 <sup>f</sup>   | ABCE           |
| Izumo City B <sup>c,e14</sup>  | Japan     | 1995 | 763 686   | 188   | 24.6 (21.3 to 28.4) | ai            | 98.4 <sup>f</sup>  | ABCE           |
| Malmö <sup>e31</sup>           | Sweden    | 1995 | 2 674 144 | 197   | 7.4 (6.4 to 8.5)    | abde          | 89                 | ABF            |
| Erlangen <sup>e32</sup>        | Germany   | 1995 | 202 900   | 12    | 5.9 (3.4 to 10.4)   | abdejk        | 97                 | DF             |
| L'Aquila <sup>c,e33</sup>      | Italy     | 1996 | 1 488 225 | 118   | 7.9 (6.6 to 9.5)    | abcdefghijklm | 96.6 <sup>f</sup>  | ABCDF          |
| Takashima <sup>34</sup>        | Japan     | 1996 | 887 216   | 190   | 21.4 (18.6 to 24.7) | aehijk        | 89.6               | DF             |
| Sweden south <sup>35</sup>     | Sweden    | 1996 | 1 141 752 | 106   | 9.3 (7.7 to 11.2)   | a             | 100 <sup>d,f</sup> | ABCF           |
| Melbourne <sup>e36</sup>       | Australia | 1996 | 133 816   | 12    | 9.0 (5.1 to 15.8)   | bdg           | 91 <sup>d</sup>    | ABF            |
| South London <sup>37</sup>     | UK        | 1996 | 938 132   | 77    | 8.2 (6.6 to 10.3)   | abefij        | 88 <sup>d</sup>    | ABF            |
| Valentia <sup>e38</sup>        | Italy     | 1996 | 179 186   | 12    | 6.7 (3.8 to 11.7)   | abdejk        | 96                 | BF             |
| Valle d'Aosta <sup>39</sup>    | Italy     | 1997 | 118 723   | 14    | 11.8 (7.0 to 19.9)  | abdej         | 97 <sup>d</sup>    | ABCDF          |
| Melbourne B <sup>e40</sup>     | Australia | 1998 | 613 262   | 56    | 9.2 (7.1 to 11.9)   | abcdefghijkl  | 88.7 <sup>d</sup>  | ABDF           |
| Martinique <sup>41</sup>       | Caribbean | 1998 | 360 000   | 20    | 5.6 (3.6 to 8.6)    | abeijk        | 92.8               | F <sup>g</sup> |
| Kumamoto <sup>c42</sup>        | Japan     | 1998 | 9 300 000 | 2,115 | 22.7 (21.8 to 23.7) | bj            | 100 <sup>f</sup>   | ACDE           |
| Porto rural <sup>43</sup>      | Portugal  | 1999 | 74 178    | 6     | 8.1 (3.6 to 18)     | abdefghijklm  | 96                 | ABCF           |
| Porto urban <sup>43</sup>      | Portugal  | 1999 | 172 046   | 17    | 9.9 (6.1 to 15.9)   | abdefghijklm  | 97.4               | ABCF           |
| Orebro <sup>44</sup>           | Sweden    | 1999 | 123 503   | 11    | 8.9 (4.9 to 16.1)   | abdefkm       | 84                 | ABF            |

|                                            |             |      |           |    |                     |            |                     |                |
|--------------------------------------------|-------------|------|-----------|----|---------------------|------------|---------------------|----------------|
| Scotland <sup>45</sup>                     | UK          | 1999 | 212 708   | 23 | 10.8 (7.2 to 16.3)  | abfl       | 90.6                | BF             |
| Perth C <sup>29</sup>                      | Australia   | 2000 | 143 417   | 12 | 8.4 (4.8 to 14.7)   | abdfhjk    | 89.1 <sup>d</sup>   | BCDF           |
| Sicilian Aeolian Archipelago <sup>46</sup> | Italy       | 2000 | 40 293    | 1  | 2.5 (0.4 to 17.6)   | abehjk     | 82.2                | F <sup>g</sup> |
| Aconcagua Valley <sup>c,e47</sup>          | Chile       | 2001 | 688 824   | 33 | 4.8 (3.4 to 6.7)    | beghikm    | 61 <sup>f</sup>     | ABCE           |
| Acquaviva, Puglia <sup>e48</sup>           | Italy       | 2001 | 77 470    | 3  | 3.9 (1.3 to 12.0)   | abdehjk    | 100 <sup>d,f</sup>  | ACDF           |
| Lund-Orup B <sup>49</sup>                  | Sweden      | 2001 | 234 505   | 17 | 7.3 (4.5 to 11.7)   | abdehjkm   | <sup>g</sup>        | ABDF           |
| South London B <sup>50</sup>               | UK          | 2001 | 1 780 038 | 94 | 5.3 (4.3 to 6.5)    | abefghkl   | 89.8 <sup>d</sup>   | ABDF           |
| Iquique <sup>e51</sup>                     | Chile       | 2001 | 396 311   | 15 | 3.9 (2.3 to 6.3)    | abdefgh    | 91                  | ABF            |
| Auckland C <sup>e52</sup>                  | New Zealand | 2002 | 897 882   | 87 | 9.7 (7.9 to 12.0)   | abdegiklm  | 91.1 <sup>d</sup>   | ABDF           |
| Barbados <sup>53</sup>                     | Caribbean   | 2002 | 478 136   | 13 | 2.7 (1.6 to 4.7)    | abefghjklm | 95.4 <sup>d</sup>   | ABDF           |
| Tartu <sup>54</sup>                        | Estonia     | 2002 | 202 244   | 18 | 8.9 (5.6 to 14.1)   | abehjm     | 90                  | BF             |
| Tbilisi <sup>e55</sup>                     | Georgia     | 2002 | 140 940   | 23 | 16.3 (10.8 to 24.6) | aehijl     | 78 <sup>f</sup>     | AF             |
| Matão <sup>e56</sup>                       | Brazil      | 2004 | 75 053    | 1  | 1.3 (0.2 to 9.5)    | abdefhjk   | 100 <sup>f</sup>    | ABF            |
| Oxford B OXVASC <sup>c,e57</sup>           | UK          | 2005 | 546 636   | 38 | 7.0 (5.1 to 9.6)    | abcefijkm  | 94.7 <sup>d,f</sup> | ABCF           |
| Joinville A <sup>e58</sup>                 | Brazil      | 2005 | 974 094   | 55 | 5.7 (4.3 to 7.4)    | abefhijkl  | 93.1                | ACF            |
| Mumbai <sup>59</sup>                       | India       | 2005 | 313 722   | 14 | 4.5 (2.6 to 7.5)    | abdefghil  | 89.2                | BF             |
| IBERICTUS <sup>60</sup>                    | Spain       | 2006 | 1 440 979 | 59 | 4.1 (3.2 to 5.3)    | abjk       | 99.1                | F <sup>g</sup> |
| Dublin <sup>61</sup>                       | Ireland     | 2006 | 294 529   | 26 | 8.8 (6.0 to 13.0)   | abdefhijkm | 93.8 <sup>d</sup>   | ABDF           |

|                                       |           |      |           |     |                     |                        |                   |                |
|---------------------------------------|-----------|------|-----------|-----|---------------------|------------------------|-------------------|----------------|
| Ludwigshafen <sup>e62</sup>           | Germany   | 2006 | 335 812   | 17  | 5.1 (3.2 to 8.1)    | abcdehijk              | 97.7              | AF             |
| North Iwate Prefecture <sup>e63</sup> | Japan     | 2006 | 1 176 400 | 328 | 27.9 (25.0 to 31.0) | bdeh                   | 99 <sup>d</sup>   | DF             |
| Valley d'Aosta C <sup>e64</sup>       | Italy     | 2006 | 625 515   | 44  | 7.0 (5.2 to 9.5)    | abdefhijkm             | 93                | ABDF           |
| Mashhad (MSIS) <sup>e65</sup>         | Iran      | 2007 | 450 229   | 15  | 3.3 (2.0 to 5.5)    | abdeghijkl             | 98.4 <sup>d</sup> | ABF            |
| Iceland <sup>e66</sup>                | Iceland   | 2008 | 238 984   | 23  | 9.6 (6.4 to 14.5)   | bdefk                  | 97 <sup>d</sup>   | DF             |
| Varaždin <sup>e67</sup>               | Croatia   | 2008 | 368 230   | 30  | 8.2 (5.7 to 11.7)   | abdefhijkm             | 87                | ABCDF          |
| Durango (BASID) <sup>e68</sup>        | Mexico    | 2008 | 247 665   | 20  | 8.1 (5.2 to 12.5)   | aejk                   | 89.5 <sup>d</sup> | ABDF           |
| Udine <sup>e69</sup>                  | Italy     | 2008 | 306 624   | 25  | 8.2 (5.5 to 12.1)   | abcdefhijk             | 97.3              | DF             |
| Baotou <sup>c,e70</sup>               | China     | 2010 | 3 652 384 | 226 | 6.2 (5.4 to 7.1)    | aefhikm <sup>i</sup>   | 97 <sup>f</sup>   | ABCD           |
| Adelaide <sup>e71</sup>               | Australia | 2010 | 148 028   | 7   | 4.7 (2.3 to 9.9)    | abcdefghj              | 95                | DF             |
| Island of Lesbos <sup>e72</sup>       | Greece    | 2010 | 86 436    | 5   | 5.8 (2.4 to 13.9)   | abefhijm               | 92.4 <sup>d</sup> | BDF            |
| Adelaide rural <sup>e73</sup>         | Australia | 2010 | 192 072   | 5   | 2.6 (1.1 to 6.3)    | abcdefhj               | 100 <sup>f</sup>  | F <sup>g</sup> |
| Akure, Ondo <sup>e74</sup>            | Nigeria   | 2011 | 491 033   | 20  | 4.1 (2.6 to 6.3)    | abeghijkl              | <sup>g</sup>      | F <sup>g</sup> |
| Joinville B <sup>e75</sup>            | Brazil    | 2012 | 1 073 318 | 52  | 4.8 (3.7 to 6.7)    | abefhijk               | 99                | ACF            |
| Tandil <sup>e76</sup>                 | Argentina | 2014 | 261 180   | 17  | 6.5 (4.1 to 10.5)   | befghijkm <sup>i</sup> | 94.3              | ABF            |

Abbreviations: CI, indicates confidence interval; CT, computerized tomography; Py, person-years; SAH, subarachnoid hemorrhage.

<sup>a</sup>Case finding methods. Inclusion criteria were involvement of all hospitals in the region and at least a or b. a= death certificates; b= general practitioners; c= rehabilitation; d= nursing homes; e= regular search (this term has been used in studies published before 2005; in current studies this suggests repetitive search/contact); f= review/screening of radiology reports; g= media attention (television, newspaper, radio); h= outpatient

clinics, health centers; i= sudden deaths; j= emergency rooms, ambulance, on call medical services; k= explicit use of ICD-codes; l= door-to-door, home visits, social services; m= autopsy reports.

<sup>b</sup>Additional diagnostic criteria, besides CT. For inclusion, a CT/neuroimaging rate of at least 80% was necessary or at least A or B. A= lumbar puncture; B= autopsy; C= angiography; D= MRI; E= surgery; F= WHO definition of stroke/SAH.

<sup>c</sup>Studies based primarily on SAH, in contrast with general stroke studies.

<sup>d</sup>Studies not providing the exact proportion of CT, but the proportion of CT and/or MRI and/or autopsy.

<sup>e</sup>Study also included for age- and sex-specific analyses (total n=34). Additionally, following studies were included: Takashima, Japan - 4 study periods<sup>86</sup>, Arcadia, Greece<sup>88</sup> and ACROSS<sup>87</sup>.

<sup>f</sup>Studies providing proportion of CT/MRI use in SAH patients exclusively, in contrast with CT rate in patients with stroke in general.

<sup>g</sup>Proportion of neuroimaging or diagnostic criteria unknown, but inclusion after discussion among authors of this review.

<sup>h</sup>CT was available after 1992, and before 1992, all patients were diagnosed with lumbar puncture or autopsy.

<sup>i</sup>Verbal autopsies were defined as the acquisition of further information on a patient's death through contact of close family members, e.g. when there were sudden, out-of-hospital deaths or inconclusive death certificates. In some cases, the family physician was further contacted or home visits were performed.

Note: Diagnostic criteria and case finding methods were only listed above when explicitly specified by the authors; thus, some studies may have used additional diagnostic criteria or case finding methods that were not specifically mentioned.

**eTable 2.** Characteristics of the overall and age-specific and sex-specific datasets

|                                      | <b>Overall</b>    | <b>Age- and sex-specific</b> |
|--------------------------------------|-------------------|------------------------------|
| Study periods (no of studies)        | 84 (79)           | 34 (29)                      |
| Person-years                         | 67,746,051        | 17,029,016                   |
| SAHs                                 | 8,176             | 2,133                        |
| Crude incidence (*10 <sup>-5</sup> ) | 7.9               | 10.3                         |
| Mean age (years)                     | 38.6*             | 47.4                         |
| Women (%)                            | 50.8 <sup>†</sup> | 51.8                         |
| Mean midyear of study                | 1996              | 2000                         |
| Contribution to person-years (%)     |                   |                              |
| Europe                               | 46.1              | 17.4                         |
| Finland                              | 4.2               | 0.0                          |
| Europe to not Finland                | 42.0              | 17.4                         |
| Asia                                 | 29.7              | 33.7                         |
| Japan                                | 20.8              | 17.5                         |
| Asia to not Japan                    | 8.9               | 16.2                         |
| Australia/New Zealand                | 8.9               | 34.2                         |
| North America                        | 8.2               | 1.5                          |
| South/Middle America                 | 6.4               | 11.1                         |
| Africa                               | 0.7               | 2.2                          |

\*Estimate based on 64 studies, <sup>†</sup>estimate based on 66 studies



**eTable 3.** Crude SAH incidence with 95% CIs and risk ratios for SAH in the age-specific and sex-specific dataset

|                                    | <b>Overall</b><br><b>(34 study periods)</b>    | <b>Europe</b><br><b>(12 study periods)</b>     | <b>Japan</b><br><b>(8 study periods)</b>         |
|------------------------------------|------------------------------------------------|------------------------------------------------|--------------------------------------------------|
| <b>Crude SAH incidence (95%CI)</b> | 10.3(9.0 to 11.9)<br><br>I <sup>2</sup> =86.3% | 11.6 (9.8 to 13.7)<br><br>I <sup>2</sup> =38.1 | 21.1 (16.4 to 27.1)<br><br>I <sup>2</sup> =91.0% |
|                                    | <b>RR (95% CI)</b>                             |                                                |                                                  |
| <b>Men</b>                         |                                                |                                                |                                                  |
| 0-24 years                         | 0.03 (0.01 to 0.07)                            | --                                             | --                                               |
| 25-44 years                        | 0.32 (0.21 to 0.50)                            | 0.47 (0.20 to 1.12)                            | 0.37 (0.25 to 0.56)                              |
| 45-54 years                        | Reference                                      | Reference                                      | Reference                                        |
| 55-74 years                        | 1.24 (0.86 to 1.78)                            | 1.26 (0.79 to 2.03)                            | 1.12 (0.82 to 1.53)                              |
| ≥75 years                          | 1.54 (1.03 to 2.32)                            | 1.4 (0.87 tot 2.60)                            | 1.16 (0.77 to1.74)                               |
| <b>Women</b>                       |                                                |                                                |                                                  |
| 0-24 years                         | 0.05 (0.02 - 0.11)                             | --                                             | 0.02 (0.00 to 0.08)                              |
| 25-44 years                        | 0.32 (0.21 to 0.49)                            | 0.51 (0.22 to 1.22)                            | 0.25 (0.16 to 0.39)                              |
| 45-54 years                        | 0.98 (0.64 to 1.50)                            | 0.84 (0.45 to 1.57)                            | 0.77 (0.44 to 1.36)                              |
| 55-74 years                        | 1.52 (1.06 to 2.17)                            | 1.51 (0.95 to 2.40)                            | 1.66 (1.04 to 2.64)                              |
| ≥75 years                          | 2.38 (1.64 to 3.45)                            | 1.49 (0.91 to 2.46)                            | 2.98 (1.02 to 4.88)                              |

Abbreviations: RR indicates risk ratio; SAH, aneurysmal subarachnoid hemorrhage

**eTable 4.** Overall and age-specific risk ratios in women vs men in the age-specific and sex-specific dataset (34 study periods)

|             | <b>Overall (34 study periods)</b> | <b>Europe (12 study periods)</b> | <b>Japan (8 study periods)</b> |
|-------------|-----------------------------------|----------------------------------|--------------------------------|
|             | <b>Risk ratio (95% CI)</b>        | <b>Risk ratio (95% CI)</b>       | <b>Risk ratio (95% CI)</b>     |
| All ages    | 1.27 (0.98 to 1.66)               | 1.10 (0.82 to 1.48)              | 1.26 (0.78 to 2.06)            |
| 0-24 years  | 1.40 (0.56 to 3.47)               | --                               | --                             |
| 25-44 years | 0.99 (0.63 to 1.56)               | 1.08 (0.38 to 3.09)              | 0.67 (0.40 to 1.45)            |
| 45-54 years | 0.96 (0.65 to 1.42)               | 0.82 (0.43 to 1.66)              | 0.86 (0.63 to 1.18)            |
| 55-74 years | 1.23 (0.93 to 1.62)               | 1.19 (0.87 to 1.63)              | 1.42 (1.08 to 1.85)            |
| ≥75 years   | 1.54 (1.06 to 2.24)               | 1.00 (0.66 to 1.51)              | 2.15 (1.52 to 3.05)            |

The limited number of studies from the remaining continents did not permit comparison of differences in age- and sex-specific SAH incidence over time, by age, sex or between continents.

Abbreviations: RR indicates risk ratio; CI, confidence interval

**eTable 5.** Time trends in SAH incidence in the in the age-specific and sex-specific dataset (34 study periods)

|                                       | <b>Overall (34 study periods)</b> | <b>Europe (12 study periods)</b> | <b>Japan (8 study periods)</b> |
|---------------------------------------|-----------------------------------|----------------------------------|--------------------------------|
| SAH incidence per 100,000 py (95% CI) | 10.3 (9.0 to 11.9)                | 11.6 (9.8 to 13.7)               | 21.1 (16.4 to 27.1)            |
| Midyear and range                     | 1998 (1977 to 2014)               | 1996 (1979 to 2008)              | 1994 (1997 to 2006)            |
| <b>Annual decline (95% CI)</b>        |                                   |                                  |                                |
| Crude                                 | 2.2% (0.6 to 3.7)                 | 2.0% (-0.1 to 4.0)               | -4.3% (-7.3 to -1.3)*          |
| Sex-adjusted                          | 2.2% (0.7 to 3.7)                 | 2.0% (-0.1 to 4.0)               | -4.2% (-7.2 to -1.3)*          |
| Age-adjusted                          | 2.3% (1.2 to 3.3)                 | 0.7% (-1.3 to 2.7)               | -0.9% (-2.4 to -0.6)*          |
| <b>Time trend by sex</b>              |                                   |                                  |                                |
| Women                                 | 1.4% (-0.9 to 3.6)                | 0.5% (-2.4 to 3.2)               | -6.8% (- 11.4 to -2.4)*        |
| Women (age-adjusted)                  | 1.3% (- 0.3 to 2.8)               | -0.8% (-3.5 to 1.8)              | -2.4% (-4.3 to -0.5)*          |
| Men                                   | 3.1% (1.0 to 5.1)                 | 3.9% (0.9 to 6.8)                | -1.7% (-5.4 to -2.0)*          |
| Men (age-adjusted)                    | 3.4% (1.9 to 4.8)                 | 2.6% (-0.4 to 5.5)               | -1.0% (-1.1 to -3.0)*          |

The limited number of studies from the remaining continents did not permit comparison of differences in age- and sex-specific SAH incidence over time, by age, sex or between continents.

Abbreviations: CI indicates confidence interval. \* a negative decrease implies an increase.

**eTable 6.** Estimated blood pressures in 1980 and 2010 for women and men aged 45-54 years and 55-74 years including annual change from 1977 to 2014

| Age 45-54 years |              | <b>BP 1980</b> | <b>95% CI</b>  | <b>BP 2010</b> | <b>95% CI</b>  | <b>Annual change BP</b> | <b>95% CI</b>  |
|-----------------|--------------|----------------|----------------|----------------|----------------|-------------------------|----------------|
|                 | Systolic BP  |                |                |                |                |                         |                |
|                 | Men          | 136.2          | 134.8 to 137.6 | 129.1          | 128.1 to 130.1 | -0.24                   | -0.30 to -0.17 |
|                 | Women        | 133.5          | 132.0 to 134.9 | 126.3          | 125.3 to 127.4 | -0.24                   | -0.30 to -0.17 |
|                 | Diastolic BP |                |                |                |                |                         |                |
|                 | Men          | 79.6           | 78.5 to 80.7   | 78.9           | 78.1 to 79.8   | -0.02                   | -0.08 to 0.03  |
|                 | Women        | 77.4           | 76.3 to 78.5   | 76.7           | 75.9 to 77.5   | -0.02                   | -0.08 to 0.03  |
| Age 55-74 years |              |                |                |                |                |                         |                |
|                 | Systolic BP  |                |                |                |                |                         |                |
|                 | Men          | 145.2          | 143.8 to 146.6 | 138.1          | 137.0 to 139.1 | -0.24                   | -0.30 to -0.17 |
|                 | Women        | 142.4          | 141.0 to 143.8 | 135.3          | 134.2 to 136.3 | -0.24                   | -0.30 to -0.17 |
|                 | Diastolic BP |                |                |                |                |                         |                |
|                 | Men          | 81.7           | 80.6 to 82.8   | 81.0           | 80.2 to 81.8   | -0.02                   | -0.08 to 0.03  |
|                 | Women        | 79.5           | 78.4 to 80.6   | 78.8           | 78.0 to 79.6   | -0.02                   | -0.08 to 0.03  |

Estimates were obtained from a linear regression model in 432 observations on systolic and diastolic blood pressure specific for age, sex, midyear of study and country. The multivariable model included age, sex, midyear of study and country

**eFigure 1. Selection of studies**

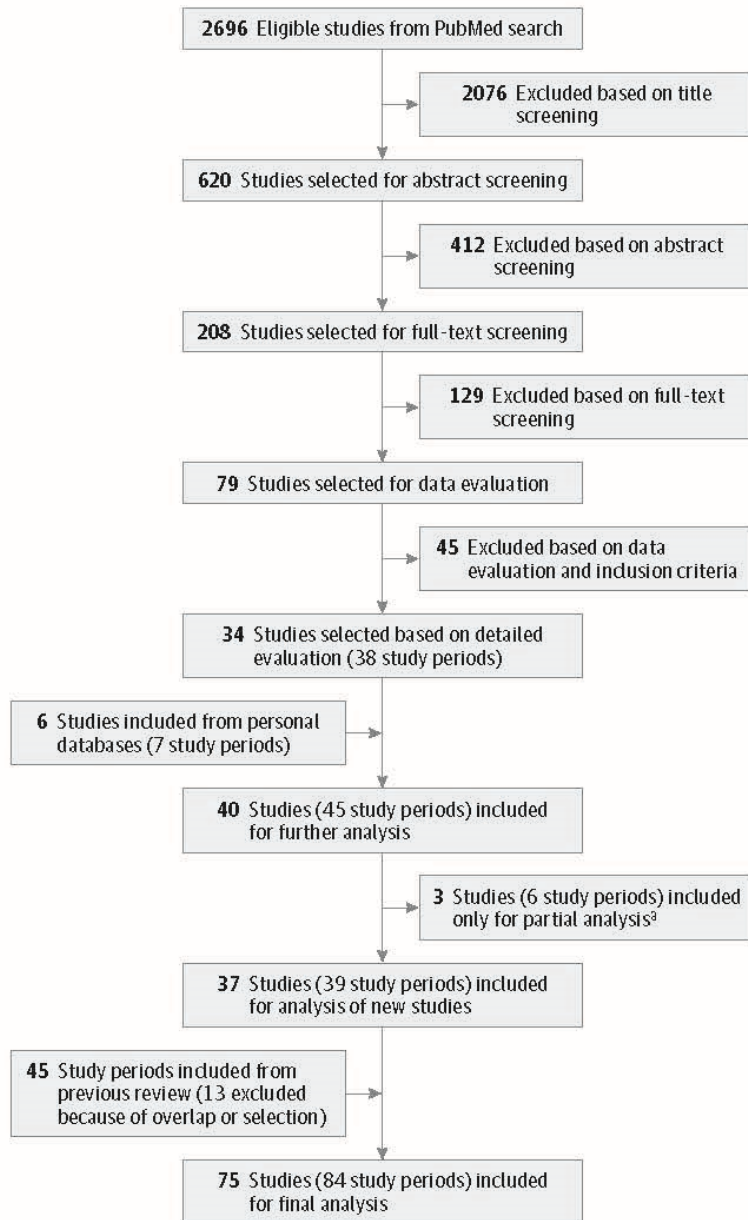

<sup>a</sup>Data from Eden et al<sup>77</sup> were only used for age-specific analyses because of age restriction older than 45 years. Data from Turin et al<sup>78</sup> and Kita et al<sup>79</sup> were only used for the age-specific or sex-specific analyses because of overlap of midyears with other studies.

**eFigure 2.** Regional time trends for studies reporting on consecutive SAH incidence for the same study population

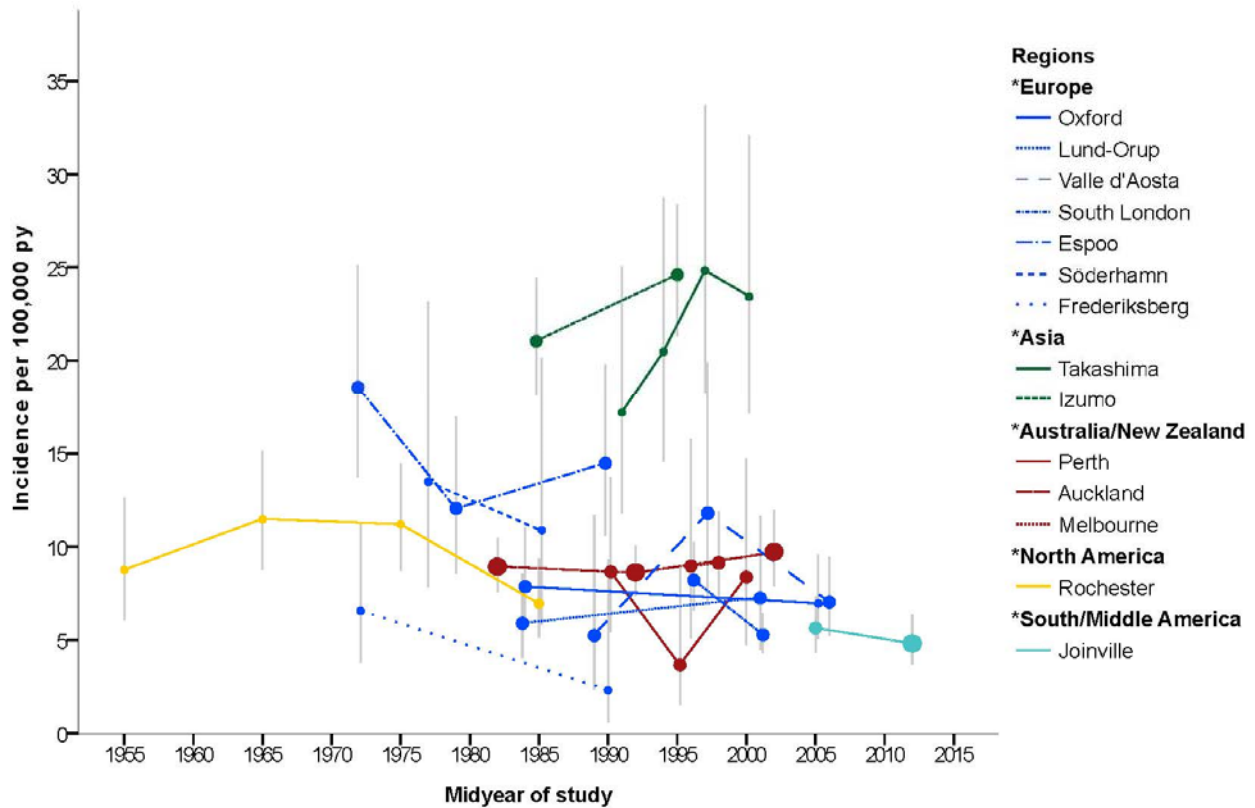

Continents are specified by colors, regions are further specified by line type. The vertical gray lines depict the 95% confidence intervals for crude SAH incidence. The dot sizes are proportional to the log of the population size in each study. The small circles represent a population less than 100 000, middle sized circles less than 500 000, and the largest circles more than 500 000 persons. Abbreviation: py, person-years.

**eFigure 3.** Crude incidence of SAH in age-specific and sex-specific dataset overall, in Europe, and in Japan only

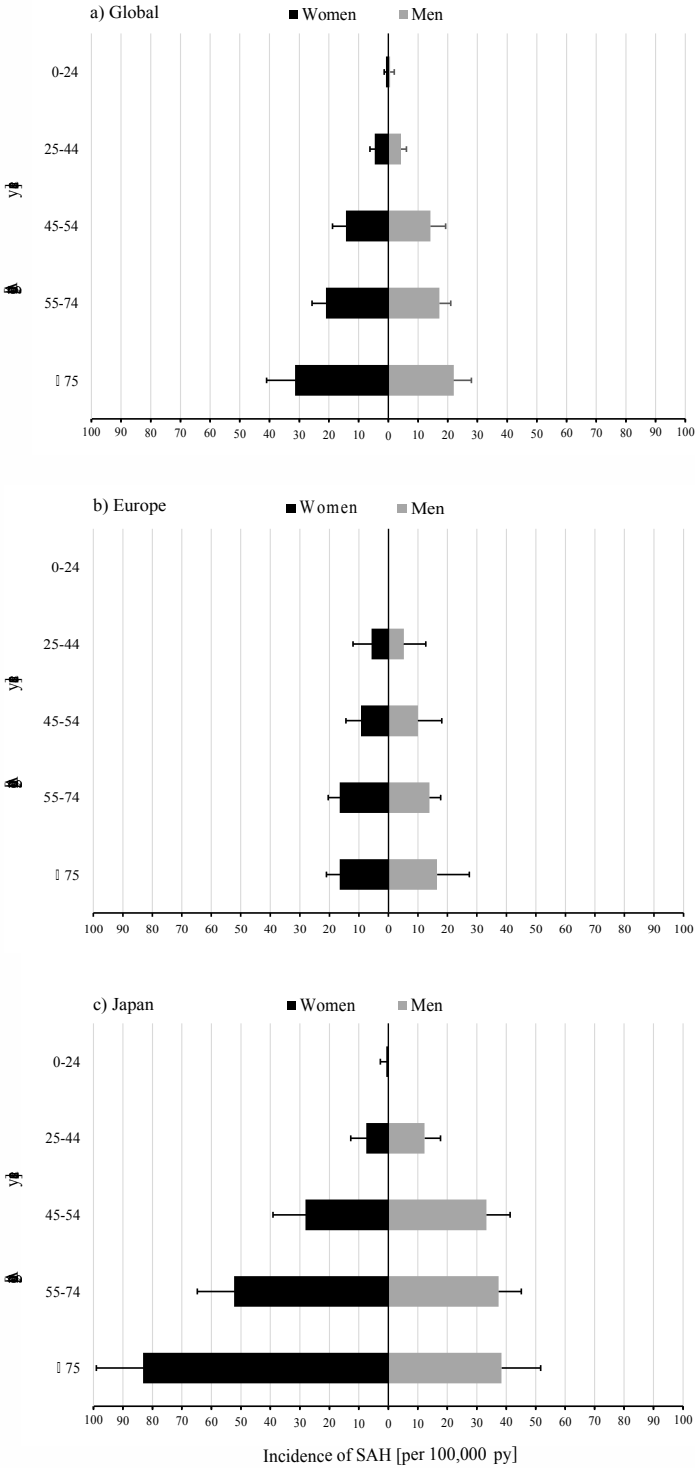

SAH incidences are shown per 100,000 person-years and caps highlight the upper 95% confidence interval. Age categories were defined according to the most common division.

## eReferences.

1. Brown RD, Whisnant JP, Sicks JD, O'Fallon WM, Wiebers DO. Stroke incidence, prevalence, and survival: secular trends in Rochester, Minnesota, through 1989. *Stroke*. 1996;27(3):373-380. Medline:8610298
2. Hansen BS, Marquardsen J. Incidence of stroke in Frederiksberg, Denmark. *Stroke*. 1977;8(6):663-665. Medline:929652
3. Numminen H, Kotila M, Waltimo O, Aho K, Kaste M. Declining incidence and mortality rates of stroke in Finland from 1972 to 1991. Results of three population-based stroke registers. *Stroke*. 1996;27(9):1487-1491. Medline:8784117
4. Tanaka H, Ueda Y, Date C, et al. Incidence of stroke in Shibata, Japan: 1976-1978. *Stroke*. 1981;12(4):460-466. Medline:7314167
5. Terént A. Increasing incidence of stroke among Swedish women. *Stroke*. 1988;19(5):598-603. Medline:3363592
6. Herman B, Leyten AC, van Luijk JH, Frenken CW, Op de Coul AA, Schulte BP. Epidemiology of stroke in Tilburg, the Netherlands. The population-based stroke incidence register: 2. Incidence, initial clinical picture and medical care, and three-week case fatality. *Stroke*. 1982;13(5):629-634. Medline:7123595
7. Sivenius J, Heinonen OP, Pyörälä K, Salonen J, Riekkinen P. The incidence of stroke in the Kuopio area of East Finland. *Stroke*. 1985;16(2):188-192. Medline:3975955
8. Bonita R, Thomson S. Subarachnoid hemorrhage: epidemiology, diagnosis, management, and outcome. *Stroke*. 1985;16(4):591-594. Medline:4024173
9. Norrving B, Löwenhielm P. Epidemiology of stroke in Lund-Orup, Sweden, 1983-85. Incidence of first stroke and age-related changes in subtypes. *Acta Neurol Scand*. 1988;78(5):408-413. Medline:3218447
10. Epstein L, Rishpon S, Bental E, et al. Incidence, mortality, and case-fatality rate of stroke in northern Israel. *Stroke*. 1989;20(6):725-729. Medline:2728036
11. Bamford J, Dennis M, Sandercock P, Burn J, Warlow C. The frequency, causes and timing of death within 30 days of a first stroke: the Oxfordshire Community Stroke Project. *J Neurol Neurosurg Psychiatry*. 1990;53(10):824-829. Medline:2266360
12. Sarti C, Tuomilehto J, Salomaa V, et al. Epidemiology of subarachnoid hemorrhage in Finland from 1983 to 1985. *Stroke*. 1991;22(7):848-853. Medline:1853404
13. Truelsen T, Grønbaek M, Schnohr P, Boysen G. Stroke case fatality in Denmark from 1977 to 1992: the Copenhagen City Heart Study. *Neuroepidemiology*. 2002;21(1):22-27. Medline:11744822
14. Inagawa T. Trends in incidence and case fatality rates of aneurysmal subarachnoid hemorrhage in Izumo City, Japan, between 1980-1989 and 1990-1998. *Stroke*. 2001;32(7):1499-1507. Medline:11441192
15. Ricci S, Celani MG, La Rosa F, et al. A community-based study of incidence, risk factors and outcome of transient ischaemic attacks in Umbria, Italy: the SEPIVAC study. *J Neurol*. 1991;238(2):87-90. Medline:1856742
16. Longstreth WT Jr, Nelson LM, Koepsell TD, van Belle G. Clinical course of spontaneous subarachnoid hemorrhage: a population-based study in King County, Washington. *Neurology*. 1993;43(4):712-718. Medline:8469328
17. Corso G, Bottacchi E, Giardini G, et al. Community-based study of stroke incidence in the Valley of Aosta, Italy. CARE-cerebrovascular Aosta Registry: years 2004-2005. *Neuroepidemiology*. 2009;32(3):186-195. Medline:19169040



18. D'Alessandro G, Di Giovanni M, Roveyaz L, et al. Incidence and prognosis of stroke in the Valle d'Aosta, Italy. First-year results of a community-based study. *Stroke*. 1992;23(12):1712-1715. Medline:1448819
19. Jørgensen HS, Plesner AM, Hübbe P, Larsen K. Marked increase of stroke incidence in men between 1972 and 1990 in Frederiksberg, Denmark. *Stroke*. 1992;23(12):1701-1704. Medline:1448817
20. Anderson CS, Jamrozik KD, Burvill PW, Chakera TM, Johnson GA, Stewart-Wynne EG. Determining the incidence of different subtypes of stroke: results from the Perth Community Stroke Study, 1989-1990. *Med J Aust*. 1993;158(2):85-89. Medline:8419781
21. Caicoya M, Rodríguez T, Lasheras C, Cuello R, Corrales C, Blázquez B. [Stroke incidence in Asturias, 1990-1991]. *Rev Neurol*. 1996;24(131):806-811. Medline:8681191
22. Lauria G, Gentile M, Fassetta G, et al. Incidence and prognosis of stroke in the Belluno province, Italy. First-year results of a community-based study. *Stroke*. 1995;26(10):1787-1793. Medline:7570726
23. Feigin VL, Wiebers DO, Whisnant JP, O'Fallon WM. Stroke incidence and 30-day case-fatality rates in Novosibirsk, Russia, 1982 through 1992. *Stroke*. 1995;26(6):924-929. Medline:7762039
24. Abdul-Ghaffar NU, el-Sonbaty MR, el-Din Abdul-Baky MS, Marafie AA, al-Said AM. Stroke in Kuwait: a three-year prospective study. *Neuroepidemiology*. 1997;16(1):40-47. Medline:8994939
25. Truelsen T, Bonita R, Duncan J, Anderson NE, Mee E. Changes in subarachnoid hemorrhage mortality, incidence, and case fatality in New Zealand between 1981-1983 and 1991-1993. *Stroke*. 1998;29(11):2298-2303. Medline:9804637
26. Stegmayr B, Eriksson M, Asplund K. Declining mortality from subarachnoid hemorrhage: changes in incidence and case fatality from 1985 through 2000. *Stroke*. 2004;35(9):2059-2063. Medline:15272133
27. Ohkuma H, Fujita S, Suzuki S. Incidence of aneurysmal subarachnoid hemorrhage in Shimokita, Japan, from 1989 to 1998. *Stroke*. 2002;33(1):195-199. Medline:11779910
28. Biotti D, Jacquin A, Boutarbouch M, et al. Trends in case-fatality rates in hospitalized nontraumatic subarachnoid hemorrhage: results of a population-based study in Dijon, France, from 1985 to 2006. *Neurosurgery*. 2010;66(6):1039-1043. Medline:20386139
29. Islam MS, Anderson CS, Hankey GJ, et al. Trends in incidence and outcome of stroke in Perth, Western Australia during 1989 to 2001: the Perth Community Stroke Study. *Stroke*. 2008;39(3):776-782. Medline:18239179
30. Labovitz DL, Halim AX, Brent B, Boden-Albala B, Hauser WA, Sacco RL. Subarachnoid hemorrhage incidence among Whites, Blacks and Caribbean Hispanics: the Northern Manhattan Study. *Neuroepidemiology*. 2006;26(3):147-150. Medline:16493201
31. Khan FA, Engstrom G, Jerntorp I, Pessah-Rasmussen H, Janzon L. Seasonal patterns of incidence and case fatality of stroke in Malmo, Sweden: the STROMA study. *Neuroepidemiology*. 2005;24(1-2):26-31. Medline:15459506
32. Kolominsky-Rabas PL, Sarti C, Heuschmann PU, et al. A prospective community-based study of stroke in Germany--the Erlangen Stroke Project (ESPro): incidence and case fatality at 1, 3, and 12 months. *Stroke*. 1998;29(12):2501-2506. Medline:9836758
33. Sacco S, Totaro R, Toni D, Marini C, Cerone D, Carolei A. Incidence, case-fatalities and 10-year survival of subarachnoid hemorrhage in a population-based registry. *Eur Neurol*. 2009;62(3):155-160. Medline:19571544
34. Turin TC, Kita Y, Rumana N, et al. Ambient air pollutants and acute case-fatality of cerebro-cardiovascular events: Takashima Stroke and AMI Registry, Japan (1988-2004). *Cerebrovasc Dis*. 2012;34(2):130-139. Medline:22868897

35. Nilsson OG, Lindgren A, Ståhl N, Brandt L, Säveland H. Incidence of intracerebral and subarachnoid haemorrhage in southern Sweden. *J Neurol Neurosurg Psychiatry*. 2000;69(5):601-607. Medline:11032611
36. Thrift AG, Dewey HM, Macdonell RA, McNeil JJ, Donnan GA. Incidence of the major stroke subtypes: initial findings from the North East Melbourne stroke incidence study (NEMESIS). *Stroke*. 2001;32(8):1732-1738. Medline:11486098
37. Wolfe CD, Rudd AG, Howard R, et al. Incidence and case fatality rates of stroke subtypes in a multiethnic population: the South London Stroke Register. *J Neurol Neurosurg Psychiatry*. 2002;72(2):211-216. Medline:11796771
38. Di Carlo A, Inzitari D, Galati F, et al. A prospective community-based study of stroke in Southern Italy: the Vibo Valentia incidence of stroke study (VISS). Methodology, incidence and case fatality at 28 days, 3 and 12 months. *Cerebrovasc Dis*. 2003;16(4):410-417. Medline:13130183
39. D'Alessandro G, Bottacchi E, Di Giovanni M, et al. Temporal trends of stroke in Valle d'Aosta, Italy. Incidence and 30-day fatality rates. *Neurol Sci*. 2000;21(1):13-18. Medline:10938197
40. Thrift AG, Dewey HM, Sturm JW, et al. Incidence of stroke subtypes in the North East Melbourne Stroke Incidence Study (NEMESIS): differences between men and women. *Neuroepidemiology*. 2009;32(1):11-18. Medline:18997472
41. Smadja D, Cabre P, May F, et al; ERMANCIA Study Group. ERMANCIA: Epidemiology of Stroke in Martinique, French West Indies: Part I: methodology, incidence, and 30-day case fatality rate. *Stroke*. 2001;32(12):2741-2747. Medline:11739966
42. Hamada J, Morioka M, Yano S, Kai Y, Ushio Y. Incidence and early prognosis of aneurysmal subarachnoid hemorrhage in Kumamoto Prefecture, Japan. *Neurosurgery*. 2004;54(1):31-37. Medline:14683538
43. Correia M, Magalhães R, Silva MR, Matos I, Silva MC. Stroke types in rural and urban northern Portugal: incidence and 7-year survival in a community-based study. *Cerebrovasc Dis Extra*. 2013;3(1):137-149. Medline:24348498
44. Appelros P, Nydevik I, Seiger A, Terént A. High incidence rates of stroke in Örebro, Sweden: Further support for regional incidence differences within Scandinavia. *Cerebrovasc Dis*. 2002;14(3-4):161-168. Medline:12403948
45. Syme PD, Byrne AW, Chen R, Devenny R, Forbes JF. Community-based stroke incidence in a Scottish population: the Scottish Borders Stroke Study. *Stroke*. 2005;36(9):1837-1843. Medline:16081859
46. Musolino R, La Spina P, Serra S, et al. First-ever stroke incidence and 30-day case fatality in the Sicilian Aeolian archipelago, Italy. *Stroke*. 2005;36(12):2738-2741. Medline:16282535
47. Alvarez G, Cox P, Pairoa M, García M, Delgado I, Lavados PM. Incidence of subarachnoid haemorrhage in the Aconcagua Valley, Chile: a community-based, prospective surveillance project. *J Neurol Neurosurg Psychiatry*. 2010;81(7):778-782. Medline:20581143
48. Manobianca G, Zoccolella S, Petruzzellis A, Miccoli A, Logroscino G. The incidence of major stroke subtypes in southern Italy: a population-based study. *Eur J Neurol*. 2010;17(9):1148-1155. Medline:20298424
49. Hallström B, Jönsson AC, Nerbrand C, Norrving B, Lindgren A. Stroke incidence and survival in the beginning of the 21st century in southern Sweden: comparisons with the late 20th century and projections into the future. *Stroke*. 2008;39(1):10-15. Medline:18063825
50. Heuschmann PU, Grieve AP, Toschke AM, Rudd AG, Wolfe CD. Ethnic group disparities in 10-year trends in stroke incidence and vascular risk factors: the South London Stroke Register (SLSR). *Stroke*. 2008;39(8):2204-2210. Medline:18535279

51. Lavados PM, Sacks C, Prina L, et al. Incidence, 30-day case-fatality rate, and prognosis of stroke in Iquique, Chile: a 2-year community-based prospective study (PISCIS project). *Lancet*. 2005;365(9478):2206-2215. Medline:15978929
52. Feigin V, Carter K, Hackett M, et al; Auckland Regional Community Stroke Study Group. Ethnic disparities in incidence of stroke subtypes: Auckland Regional Community Stroke Study, 2002-2003. *Lancet Neurol*. 2006;5(2):130-139. Medline:16426989
53. Wolfe CD, Corbin DO, Smeeton NC, et al. Estimation of the risk of stroke in black populations in Barbados and South London. *Stroke*. 2006;37(8):1986-1990. Medline:16794208
54. Vibo R, Kõrv J, Roose M. The Third Stroke Registry in Tartu, Estonia: decline of stroke incidence and 28-day case-fatality rate since 1991. *Stroke*. 2005;36(12):2544-2548. Medline:16254225
55. Tsiskaridze A, Djibuti M, van Melle G, et al. Stroke incidence and 30-day case-fatality in a suburb of Tbilisi: results of the first prospective population-based study in Georgia. *Stroke*. 2004;35(11):2523-2528. Medline:15472096
56. Minelli C, Fen LF, Minelli DP. Stroke incidence, prognosis, 30-day, and 1-year case fatality rates in Matão, Brazil: a population-based prospective study. *Stroke*. 2007;38(11):2906-2911. Medline:17916767
57. Lovelock CE, Rinkel GJ, Rothwell PM. Time trends in outcome of subarachnoid hemorrhage: Population-based study and systematic review. *Neurology*. 2010;74(19):1494-1501. Medline:20375310
58. Cabral NL, Gonçalves AR, Longo AL, et al. Incidence of stroke subtypes, prognosis and prevalence of risk factors in Joinville, Brazil: a 2 year community based study. *J Neurol Neurosurg Psychiatry*. 2009;80(7):755-761. Medline:19279029
59. Dalal PM, Malik S, Bhattacharjee M, et al. Population-based stroke survey in Mumbai, India: incidence and 28-day case fatality. *Neuroepidemiology*. 2008;31(4):254-261. Medline:18931521
60. Díaz-Guzmán J, Egido JA, Gabriel-Sánchez R, Barberá-Comes G, Fuentes-Gimeno B, Fernández-Pérez C; IBERICTUS Study Investigators of the Stroke Project of the Spanish Cerebrovascular Diseases Study Group. Stroke and transient ischemic attack incidence rate in Spain: the IBERICTUS study. *Cerebrovasc Dis*. 2012;34(4):272-281. Medline:23095851
61. Kelly PJ, Crispino G, Sheehan O, et al. Incidence, event rates, and early outcome of stroke in Dublin, Ireland: the North Dublin population stroke study. *Stroke*. 2012;43(8):2042-2047. Medline:22693134
62. Palm F, Urbanek C, Rose S, et al. Stroke Incidence and Survival in Ludwigshafen am Rhein, Germany: the Ludwigshafen Stroke Study (LuSSt). *Stroke*. 2010;41(9):1865-1870. Medline:20689086
63. Omama S, Yoshida Y, Ogasawara K, et al. Incidence rate of cerebrovascular diseases in northern Japan determined from the Iwate Stroke Registry with an inventory survey system. *J Stroke Cerebrovasc Dis*. 2013;22(8):e317-e322. Medline:23352113
64. Corso G, Bottacchi E, Giardini G, et al. Epidemiology of stroke in northern Italy: the Cerebrovascular Aosta Registry, 2004-2008. *Neurol Sci*. 2013;34(7):1071-1081. Medline:23007380
65. Azarpazhooh MR, Etemadi MM, Donnan GA, et al. Excessive incidence of stroke in Iran: evidence from the Mashhad Stroke Incidence Study (MSIS), a population-based study of stroke in the Middle East. *Stroke*. 2010;41(1):e3-e10. Medline:19926844
66. Hilmarsson A, Kjartansson O, Olafsson E. Incidence of first stroke: a population study in Iceland. *Stroke*. 2013;44(6):1714-1716. Medline:23660845
67. Pikića S, Cvetko D, Malojčić B, et al. A population-based prospective 24-month study of stroke: incidence and 30-day case-fatality rates of first-ever strokes in Croatia. *Neuroepidemiology*. 2012;38(3):164-171. Medline:22473420

68. Cantu-Brito C, Majersik JJ, Sánchez BN, et al. Hospitalized stroke surveillance in the community of Durango, Mexico: the brain attack surveillance in Durango study. *Stroke*. 2010;41(5):878-884. Medline:20360543
69. Janes F, Gigli GL, D'Anna L, et al. Stroke incidence and 30-day and six-month case fatality rates in Udine, Italy: a population-based prospective study. *Int J Stroke*. 2013;8(Suppl A100):100-105. Medline:23521830
70. Zhang J, Liu G, Arima H, et al; CHERISH Investigators. Incidence and risks of subarachnoid hemorrhage in China. *Stroke*. 2013;44(10):2891-2893. Medline:23899918
71. Leyden JM, Kleinig TJ, Newbury J, et al. Adelaide stroke incidence study: declining stroke rates but many preventable cardioembolic strokes. *Stroke*. 2013;44(5):1226-1231. Medline:23482602
72. Stranjalis G, Kalamatianos T, Gatzonis S, Loufardaki M, Tzavara C, Sakas DE. The incidence of the first-ever stroke in a Mediterranean island population: the isle of Lesbos stroke study. *Neuroepidemiology*. 2014;43(3-4):206-212. Medline:25402469
73. Newbury J, Kleinig T, Leyden J, et al. Stroke Epidemiology in an Australian Rural Cohort (SEARCH). *Int J Stroke*. 2017;12(2):161-168. Medline:27694313
74. Okon M, Adebobola NI, Julius S, et al. Stroke incidence and case fatality rate in an urban population. *J Stroke Cerebrovasc Dis*. 2015;24(4):771-777. Medline:25680665
75. Cabral NL, Cougo-Pinto PT, Magalhaes PS, et al. Trends of Stroke Incidence from 1995 to 2013 in Joinville, Brazil. *Neuroepidemiology*. 2016;46(4):273-281. Medline:27064414
76. Bahit MC, Coppola ML, Riccio PM, et al. First-Ever Stroke and Transient Ischemic Attack Incidence and 30-Day Case-Fatality Rates in a Population-Based Study in Argentina. *Stroke*. 2016;47(6):1640-1642. Medline:27217510
77. Eden SV, Meurer WJ, Sánchez BN, et al. Gender and ethnic differences in subarachnoid hemorrhage. *Neurology*. 2008;71(10):731-735. Medline:18550859
78. Turin TC, Kita Y, Rumana N, et al. Diurnal variation in onset of hemorrhagic stroke is independent of risk factor status: Takashima Stroke Registry. *Neuroepidemiology*. 2010;34(1):25-33. Medline:19893326
79. Kita Y, Turin TC, Ichikawa M, et al. Trend of stroke incidence in a Japanese population: Takashima Stroke Registry, 1990-2001. *Int J Stroke*. 2009;4(4):241-249. Medline:19689749
